# Supplementary material for: Endoscopic Endonasal Supraoptic and Infraoptic Approaches for Complex “Parasuprasellar” Lesions: Surgical Anatomy, Technique Nuances, and Case Series
Source: Research Square preprint supplement (doi:10.21203/rs.3.rs-622199/v1), 2021-06-22
Supplement: Supplementary file 1 [file 11fc17c1177dadabd794ccdd.pdf]

# PERMISSION LICENSE AGREEMENT

P11744.AANS.JNS.Xiao.6673.First Affiliated Hospital of Nanchang University.Bao

AANS.JNS.Xiao.6673

4/21/2021

Dr. YouYuan Bao

First Affiliated Hospital of Nanchang University  
Department of Neurosurgery  
17 Yong Wai Zheng Street  
Nanchang, China

Dear Dr. Bao,

Thank you for your interest in JNSPG material. Please note: This permission does not apply to any figure or other material that is credited to any source other than JNSPG. It is your responsibility to validate that the material is in fact owned by JNSPG. If material within JNSPG material is credited to another source (in a figure legend, for example) then any permission extended by JNSPG is invalid. We encourage you to view the actual material at [www.thejns.org](http://www.thejns.org) or a library or other source. Information provided by third parties as to credits that may or may not be associated with the material may be unreliable.

We are pleased to grant you non-exclusive, nontransferable permission, limited to the format described below, and provided you meet the criteria below, and on receipt of payment. Such permission is for one-time use and does not include permission for future editions, languages, revisions, additional printings or distribution, updates, ancillaries, customized forms, any electronic forms, translations or promotional pieces unless otherwise specified below. We must be contacted for permission each time such use is planned. This permission does not include the right to modify the material unless otherwise specified. Use of the material must not imply any endorsement by the copyright owner. This permission is not valid for the use of JNSPG logos or other collateral material, may not be resold, and may not be used on open-access websites.

## **PERMISSION IS VALID FOR THE FOLLOWING MATERIAL ONLY:**

### **Figures 2, 4, and 5**

Journal of Neurosurgery, , 2020, 133, 2, Endoscopic endonasal anterior clinoidectomy: surgical anatomy, technique nuance, and case series, Xiao, 451-461

## **IN THE FOLLOWING WORK ONLY, and in any non-profit-making edition intended for the print disabled:**

**electronic and/or print copies of academic paper titled \_\_\_\_\_  
to be published in \_\_\_\_\_  
by publishing company \_\_\_\_\_,  
on payment of fee unless fee is waived. If fee is waived no further action is necessary.**

## **ON PAYMENT OF PERMISSIONS FEE:**

**Fee is waived if material is used in a new academic (not commercial) work when an author is common to both the original JNS paper and the new paper.**

Failure to pay the fee(s) or to follow instructions here upon use of the work as described here, will result in automatic termination of the license or permission granted. Payment should be made in US Dollars to Rockwater, Inc. via mail (check) or via Paypal (PCI compliant credit card payment). For payment by wire transfer please contact us. The party purchasing permission is responsible for payment of tax as may be required by law. Please see second page for additional terms and conditions.

Please contact Beth Ann Rocheleau at [brocheleau@rockwaterinc.com](mailto:brocheleau@rockwaterinc.com) or 1-803-429-4933 with questions.

CREDIT LINE(S) must be published next to any figure, and/or if permission is granted for electronic form, visible at the same time as the content republished with a hyperlink to the publisher's home page.

Abstracts or collections of abstracts and all translations must be approved by publisher's agent in advance, and in the case of translations, before printing. No financial liability for the project will devolve upon JNSPG or on Rockwater, Inc.. All expenses for translation, validation of translation accuracy, publication costs and reproduction costs are the sole responsibility of the foreign language sponsor. The new work must be reprinted and delivered as a stand-alone piece and may not be integrated or bound with other material. JNSPG does not supply photos or artwork; these may be downloaded from the JNSPG website, scanned, or (if available) obtained from the author of the article.

**Submission of form and/or payment conveys acceptance of terms and conditions stated here.**

**Limitation of Liability and Disclaimer of Warranty: Rockwater, Inc. and Journal of Neurosurgery Publishing Group (JNSPG) and AANS make no warranties with respect to the material presented here or the material for which permission is being granted; do not assume any expressly disclaim and liability for any loss or damage caused by errors or omissions whether such error or omissions result from negligence, accident or otherwise; and specifically disclaim any warranty of quality, performance, merchantability or fitness for a specific purpose. In no event will Rockwater, Inc. or JNSPG, or AANS be liable for any direct, indirect, special, incidental or consequential damages, including without limitation any lost profits, lost savings, lost revenues, loss of data, or costs of recovery, arising out of the use of or inability to use the material, regardless of whether such losses are foreseeable or whether such damages are deemed to result from the failure or inadequacy of any exclusive or other remedy.**

For translating and reprinting of ARTICLES for commercial use the following rules apply:

1. Translation disclaimer language must be added in both English and the language of the translation. The two versions (English and the language of the translation) of the disclaimer must appear on the inside front cover or at the beginning of the translated material, stating:  
The American Association of Neurological Surgeons (AANS), Journal of Neurosurgery Publishing Group (JNSPG) and its agents take no responsibility for the accuracy of the translation from the published English original and are not liable for any errors which may occur. No responsibility is assumed, and responsibility is hereby disclaimed, by AANS or JNSPG and its agents for any injury and/or damage to persons or property as a matter of product liability, negligence or otherwise, or from any use or operation of methods, products, instructions or ideas presented in the Journal. Independent verification of diagnosis and drug dosages should be made. Discussions, views, and recommendations of diagnosis and drug dosages are the responsibility of the authors.
2. The translation will remain the sole property of JNSPG.
3. The JNSPG cover design and JNSPG logo may not be used
4. Appropriate credit language must be added in both English and the language of the translation.
5. The license agreement must be completed, returned, and paid.
6. The translated document, complying with all of the policies noted here, must be approved by JNSPG or its agent BEFORE the reprints are produced.
7. The translated and reprinted article(s) may not be sold or re-sold.
