# Supplementary material for: Endoscopic Endonasal Supraoptic and Infraoptic Approaches for Complex “Parasuprasellar” Lesions: Surgical Anatomy, Technique Nuances, and Case Series
Source: Research Square preprint supplement (doi:10.21203/rs.3.rs-622199/v1), 2021-06-22
Supplement: Supplementary file 2 [file 64ed93d470f873d987456b2a.docx]

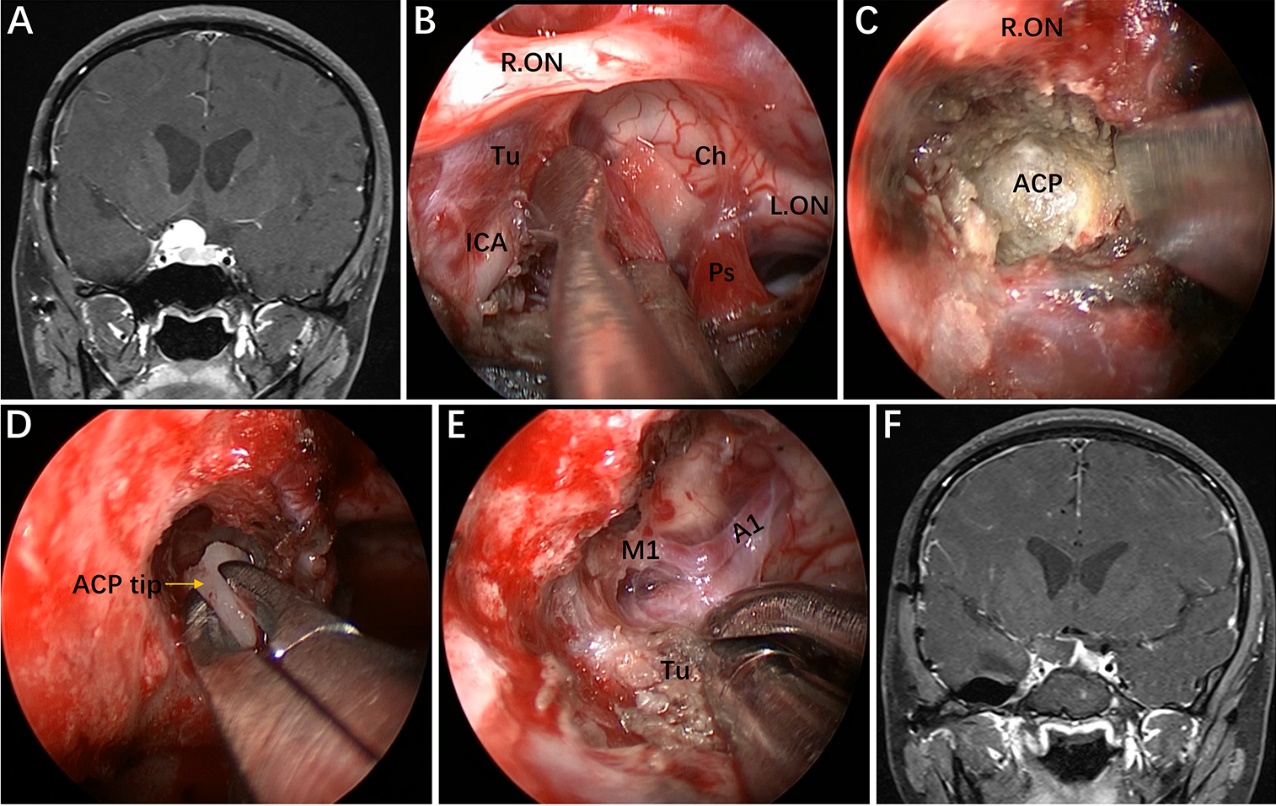


**Fig. S4.** Case 2, A 25-year-old woman presented with headache and decreased vision in her right eye for 6 months. **A:** Preoperative coronal Gd-enhanced MRI demonstrating a right recurrent ACP meningioma. **B:** Removal of the tumor on the medial and upper parts of the supraclinoidal ICA. **C and D:** Removal of the ACP invaded by the tumor. **E:** Separation of tumor adhering to the bifurcation of the ICA through the infraoptic corridor. **F:** Postoperative MRI showing total tumor removal. Some panels of the figure have been published in *Journal of Neurosurge*ry. Published with permission. The figure is available in color only online.
